# Supplementary material for: Mapping the l -tryptophan capped copper nanocluster mediated binding and targeted pH-responsive release of doxorubicin via fluorescence resonance energy transfer (FRET)
Source: Royal Society of Chemistry journal article supplement (doi:10.1039/d5ma00397k), 2025-01-01
Supplement: d5ma00397k1.pdf [file d5ma00397k1.pdf]

# Mapping the L-tryptophan Capped Copper Nanocluster Mediated Binding and Targeted pH-Responsive Release of Doxorubicin via Fluorescence Resonance Energy Transfer (FRET)

*Aarya,<sup>1</sup> Anna Sebastian,<sup>1</sup> Kavya P.,<sup>1</sup> Indrajit Bhattacharjee,<sup>2</sup> Abhishek S. Shekhawat,<sup>3</sup> Bibhu Ranjan Sarangi,<sup>2,4</sup> and Supratik Sen Mojumdar\*<sup>1</sup>*

<sup>1</sup>Department of Chemistry, Indian Institute of Technology Palakkad, Kerala, India – 678 623

<sup>2</sup>Department of Physics, Indian Institute of Technology Palakkad, Kerala, India – 678 623

<sup>3</sup>Department of Physics, SRM Institute of Science and Technology, Tamil Nadu, India – 603 203

<sup>4</sup>Department of Biological Sciences and Engineering, Indian Institute of Technology Palakkad, Kerala, India – 678 623

---

\*Email: [supratik@iitpkd.ac.in](mailto:supratik@iitpkd.ac.in)

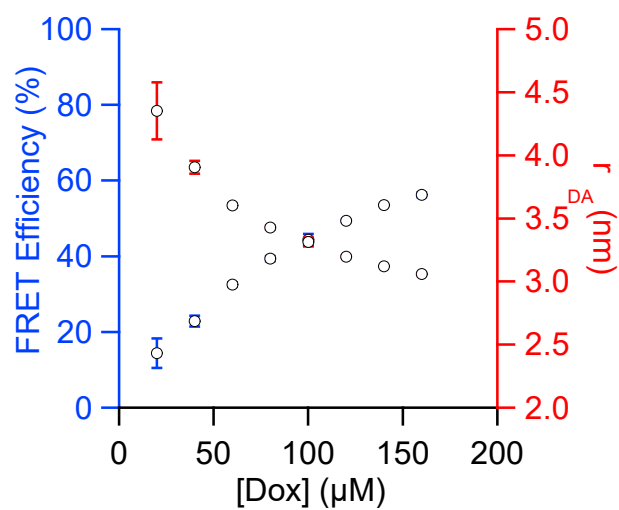

**Figure S1:** Changes in the FRET efficiency (blue) and donor-acceptor distance ( $r_{DA}$ ) (red) at increasing concentrations of Dox calculated from time-resolved FRET measurements.

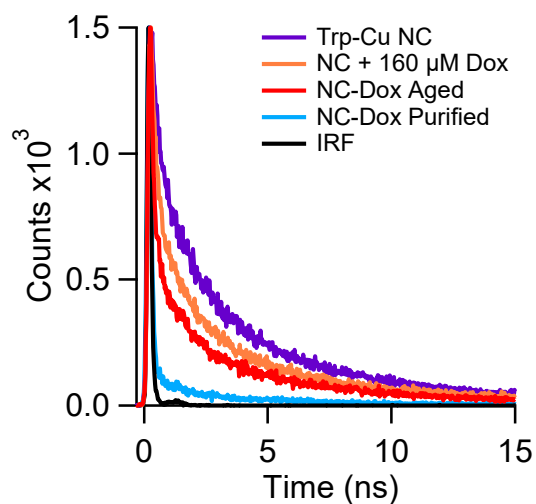

**Figure S2:** Time-resolved PL intensity decay curve ( $\lambda_{ex} = 405$  nm,  $\lambda_{em} = 480$  nm) of pure Trp-Cu NC (violet), Trp-Cu NC-Dox nano-conjugate before (orange) and after aging (red). The lifetime further decreased upon purification of the aged sample (cyan). The black curve represents the instrument response function (IRF).

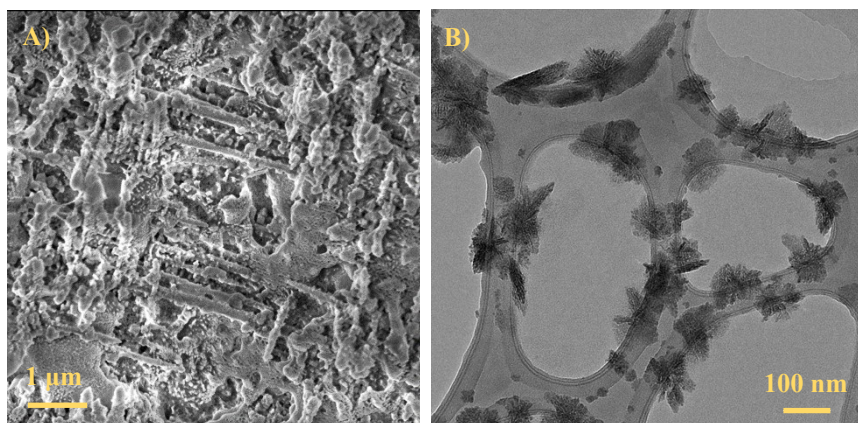

**Figure S3:** (A) FESEM image at low magnification (scale bar: 1  $\mu\text{m}$ ) of purified Trp-Cu NC-Dox nanoconjugates. (B) HRTEM image at low magnification (scale bar: 100 nm) of purified Trp-Cu NC-Dox nanoconjugates.

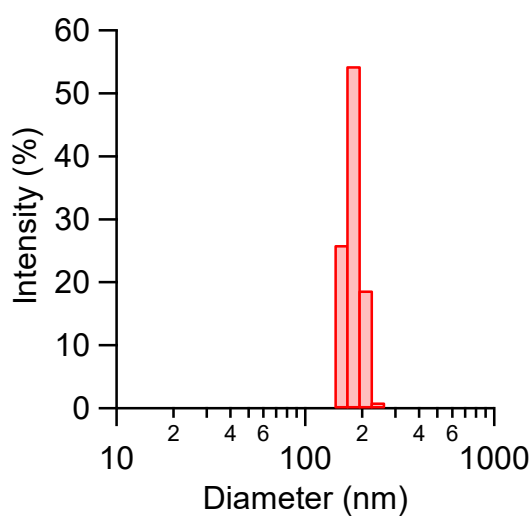

**Figure S4:** Dynamic light scattering (DLS) spectrum of Trp-Cu NC-Dox nanocnjugate.

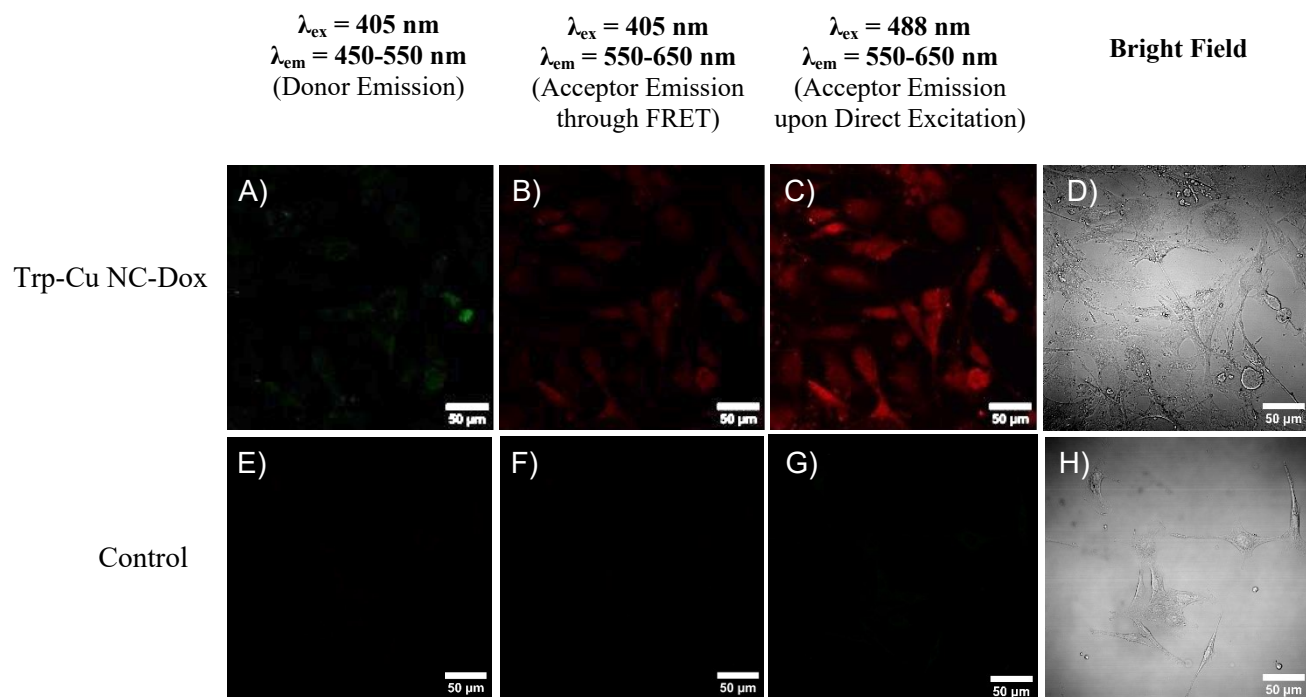

**Figure S5:** Confocal microscope images of 3T3 cells incubated (A-D) with and (E-H) without Trp-Cu NC-Dox nanoconjugate.

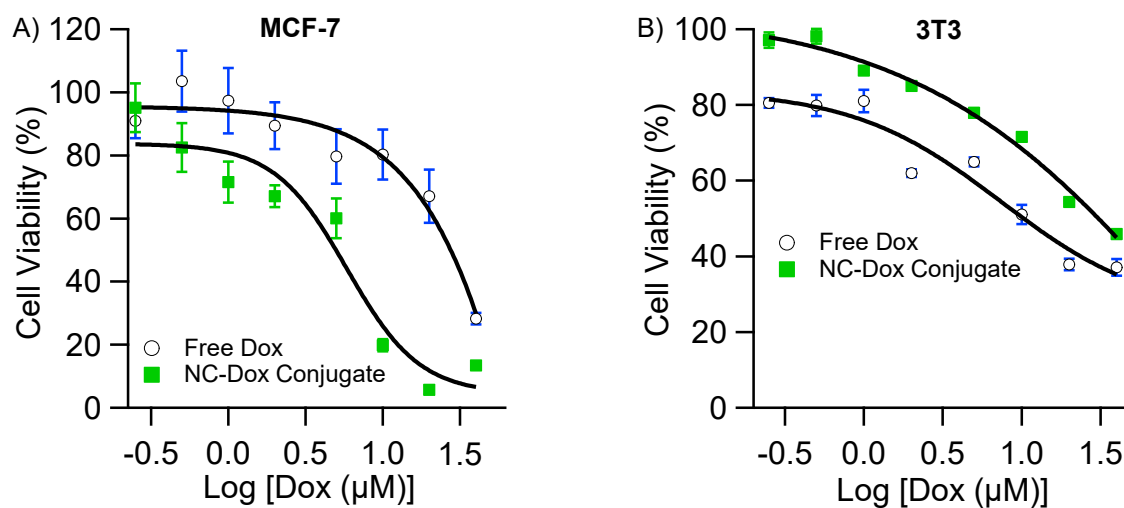

**Figure S6:** Cell viability (%) was plotted against the log of Dox concentration for free Dox (blue) and the Trp-Cu NC-Dox nanoconjugate (green) in (A) breast cancer (MCF-7) cells and (B) normal mouse fibroblast (3T3) cells. A sigmoidal fit is represented by the black line.
